# Supplementary material for: Effects of the Solder Phase Transformation on the Optimization of Reflow Soldering Parameters and Temperature Profiles
Source: Hindawi journal article supplement (doi:10.1155/2021/9955967), 2021-06-16
Supplement: f1 [file 9955967.f1.zip]

Table S1: Objective functions calculated by the method of ignoring phase transformations.

| individual | obj1 $Q_{\eta}(^{\circ}C \cdot s)$ | obj2 Peak( $^{\circ}C$ ) | obj3 $\Delta t(s)$ |
|------------|------------------------------------|--------------------------|--------------------|
| 1          | 435.071378084713                   | 240.001747245049         | 54.5               |
| 7          | 435.138443282811                   | 240.000038093407         | 54.5               |
| 9          | 436.095066154456                   | 240.000005183255         | 55                 |
| 13         | 436.113096814552                   | 240.000001260963         | 55                 |
| 20         | 436.635219563140                   | 240.000000141785         | 55                 |
| 25         | 436.645884791386                   | 240.000000010802         | 55                 |
| 29         | 436.645884978413                   | 240.000000003675         | 55                 |
| 31         | 436.645885453915                   | 240.000000001101         | 55                 |
| 32         | 436.645885615729                   | 240.000000000022         | 55                 |
| 42         | 436.645894791105                   | 240.000000000002         | 55                 |
| 71         | 436.645894791136                   | 240.000000000001         | 55                 |
