# Supplementary material for: Effects of the Solder Phase Transformation on the Optimization of Reflow Soldering Parameters and Temperature Profiles
Source: Hindawi journal article supplement (doi:10.1155/2021/9955967), 2021-06-16
Supplement: f1 [file 9955967.f1.zip]

Archive with 7 entries (7 files):
- Figure S1.eps
- Figure S2.eps
- Figure S3.eps
- Table S1.pdf
- Table S2.pdf
- Table S3.pdf
- Table S4.pdf
