# Supplementary material for: Effects of the Solder Phase Transformation on the Optimization of Reflow Soldering Parameters and Temperature Profiles
Source: Hindawi journal article supplement (doi:10.1155/2021/9955967), 2021-06-16
Supplement: f1 [file 9955967.f1.zip › Table S2.pdf]

Table S2: Objective functions calculated in the case of considering phase changes.

| individual | obj1 $Q_n(^{\circ}C \cdot s)$ | obj2 Peak( $^{\circ}C$ ) | obj3 $\Delta t(s)$ |
|------------|-------------------------------|--------------------------|--------------------|
| 1          | 445.798125864575              | 240.000000374979         | 57                 |
| 20         | 445.836849209203              | 240.000000028353         | 57                 |
| 22         | 445.839262016199              | 240.000000067790         | 57                 |
| 23         | 445.839270170281              | 240.000000006735         | 57                 |
| 28         | 445.915545051896              | 240.000000003186         | 57                 |
| 29         | 445.918071537701              | 240.000000044239         | 57                 |
| 30         | 445.918077119023              | 240.000000001474         | 57                 |
| 32         | 445.918077243486              | 240.000000001169         | 57                 |
| 37         | 445.918079847786              | 240.000000000001         | 57                 |
| 78         | 445.918079847786              | 240.000000000000         | 57                 |
