# Supplementary material for: Effects of the Solder Phase Transformation on the Optimization of Reflow Soldering Parameters and Temperature Profiles
Source: Hindawi journal article supplement (doi:10.1155/2021/9955967), 2021-06-16
Supplement: f1 [file 9955967.f1.zip › Table S3.pdf]

Table S3: Decision variables calculated by the method of ignoring phase transformations

| individual | zones 1~5(°C)    | zone 6(°C)       | zone 7(°C)       | zones 8~9(°C)    | belt speed(cm/min) |
|------------|------------------|------------------|------------------|------------------|--------------------|
| 1          | 179.316054610126 | 202.330966128912 | 226.630934861116 | 259.802984558950 | 93.901548603513    |
| 7          | 179.316047414169 | 202.331638544859 | 226.666412886039 | 259.793257677314 | 93.901303413763    |
| 9          | 179.345013744862 | 202.291774850297 | 227.021214404106 | 259.719394898866 | 93.895737902797    |
| 13         | 179.345065225426 | 202.291215538402 | 227.027917217949 | 259.718049523420 | 93.895639191728    |
| 20         | 179.317533282526 | 202.315919296434 | 227.201025030628 | 259.684675375952 | 93.894509120094    |
| 25         | 179.316120197450 | 202.315766726981 | 227.204833334926 | 259.684150958540 | 93.894537826261    |
| 29         | 179.316120193988 | 202.315766727770 | 227.204833335935 | 259.684150953054 | 93.894537834719    |
| 31         | 179.316120192544 | 202.315766727180 | 227.204833338168 | 259.684150955982 | 93.894537847072    |
| 32         | 179.316120232879 | 202.315766726871 | 227.204833339338 | 259.684150949540 | 93.894537849022    |
| 42         | 179.316120458099 | 202.315766718533 | 227.204833293272 | 259.684151039980 | 93.894538051604    |
| 71         | 179.316120458100 | 202.315766718533 | 227.204833293272 | 259.684151039980 | 93.894538051606    |
