# Supplementary material for: Effects of the Solder Phase Transformation on the Optimization of Reflow Soldering Parameters and Temperature Profiles
Source: Hindawi journal article supplement (doi:10.1155/2021/9955967), 2021-06-16
Supplement: f1 [file 9955967.f1.zip › Table S4.pdf]

Table S4: Decision variables calculated in the case of considering phase transitions.

| individual | zones 1~5(°C)    | zone 6(°C)       | zone 7(°C)       | zones 8~9(°C)    | belt speed(cm/min) |
|------------|------------------|------------------|------------------|------------------|--------------------|
| 1          | 173.406178050352 | 190.299480962866 | 232.820519206319 | 259.520843745902 | 90.3889812105954   |
| 20         | 173.412882876882 | 190.334865462780 | 232.813333467118 | 259.518626521544 | 90.3889799881188   |
| 22         | 173.411973858974 | 190.336242418321 | 232.814187167330 | 259.518488738916 | 90.3889799816190   |
| 23         | 173.411956960575 | 190.336251988680 | 232.814198879066 | 259.518488096033 | 90.3889799816112   |
| 28         | 173.370424689896 | 190.553653044524 | 232.784427046170 | 259.513997119781 | 90.3889322870352   |
| 29         | 173.370684218937 | 190.553571880500 | 232.784423520838 | 259.513979880158 | 90.3889780875678   |
| 30         | 173.370684159594 | 190.553571624880 | 232.784423493538 | 259.513979900482 | 90.3889782545808   |
| 32         | 173.370684159780 | 190.553571619373 | 232.784423493755 | 259.513979901316 | 90.3889782577656   |
| 37         | 173.370684246093 | 190.553571847825 | 232.784423496057 | 259.513979883852 | 90.3889783063524   |
| 78         | 173.370682466448 | 190.553574493873 | 232.784424355760 | 259.513980791664 | 90.3889817825526   |
